# Supplementary material for: Neurogranin Regulates Adult-Born Olfactory Granule Cell Spine Density and Odor-Reward Associative Memory in Mice
Source: MDPI journal article supplement (doi:10.3390/ijms22084269), 2021-04-20
Supplement: s1 [file s1]

## Supplementary materials

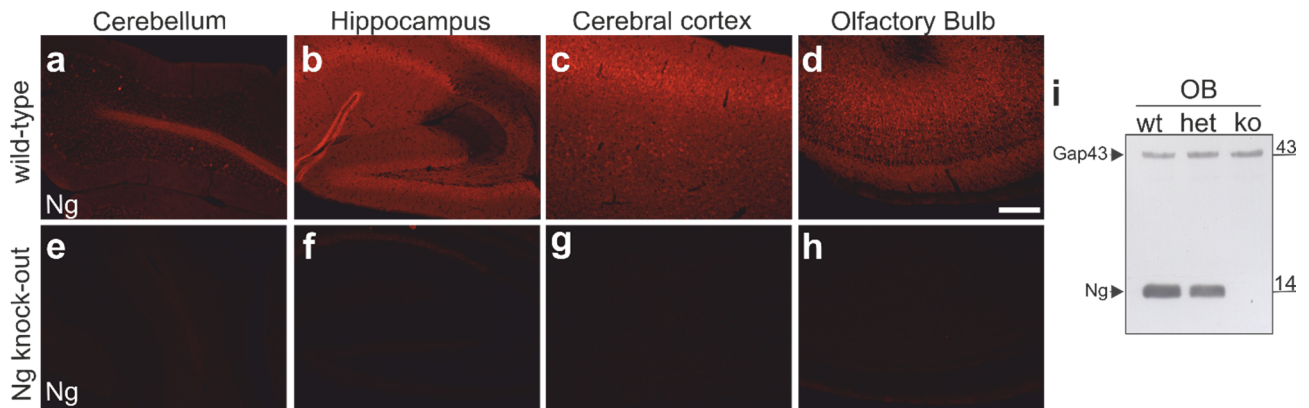

**Supplementary Figure S1.** Characterization of Ng expression in Ng-ko mice. (a–h) Characterization of Ng protein presence by immunofluorescence staining in different brain regions of wt (a–d) and Ng-ko (e–h) mice. Scale bar in d = 200  $\mu$ m and applies to (a–h). (i) Western blot analysis on OB extracts indicates the absence of a Ng-positive band (14 KDa) in Ng-ko mice. A band at 43 KDa corresponding to Gap43 is present in all three genotypes at comparable intensity.

|       | GL                | EPL               | GCL               | SVZ               | TOT               |
|-------|-------------------|-------------------|-------------------|-------------------|-------------------|
| wt    | 1,813 $\pm$ 0,025 | 1,979 $\pm$ 0,068 | 2,341 $\pm$ 0,036 | 0,067 $\pm$ 0,024 | 6,200 $\pm$ 0,105 |
| het   | 1,848 $\pm$ 0,029 | 2,194 $\pm$ 0,091 | 2,608 $\pm$ 0,053 | 0,055 $\pm$ 0,005 | 6,705 $\pm$ 0,168 |
| Ng-ko | 1,822 $\pm$ 0,001 | 2,039 $\pm$ 0,178 | 2,428 $\pm$ 0,004 | 0,064 $\pm$ 0,004 | 6,353 $\pm$ 0,183 |

**Supplementary Table S1.** Volume of OB layers. The volume ( $\text{mm}^3 \pm$  standard deviation) of each OB layer is shown in wild type (wt), heterozygotes (het) and Ng-knock-out mice (Ng-ko); n = 2 for each genotype.
